# Supplementary material
Source: MDPI journal article supplement (https://www.mdpi.com/2072-4292/13/6/1208)
Supplement: s1 [file s1]

## *Supplement materials*

# **A comprehensive accuracy evaluation of latest GPM IMERG V06 Early, Late and Final precipitation products across China**

Linfei Yu<sup>1,2</sup>, Guoyong Leng<sup>1,2\*</sup>, Jian Peng<sup>3,4</sup> and Andre Python<sup>5</sup>

<sup>1</sup> Key Laboratory of Water Cycle and Related Land Surface Processes, Institute of Geographic Science and Natural Resources Research, Chinese Academy of Sciences, Beijing 100011, China

<sup>2</sup> University of Chinese Academy of Sciences, Beijing 101400, China

<sup>3</sup> Department of Remote Sensing, Helmholtz Centre for Environmental Research - UFZ, Permoserstrasse 15, 04318, Leipzig, Germany

<sup>4</sup> Remote Sensing Centre for Earth System Research, Leipzig University, Germany

<sup>5</sup> Big Data Institute, University of Oxford, Oxford OX3 7LF, UK

\*Corresponding author: Guoyong Leng

E-mail: lenggy@igsnrr.ac.cn

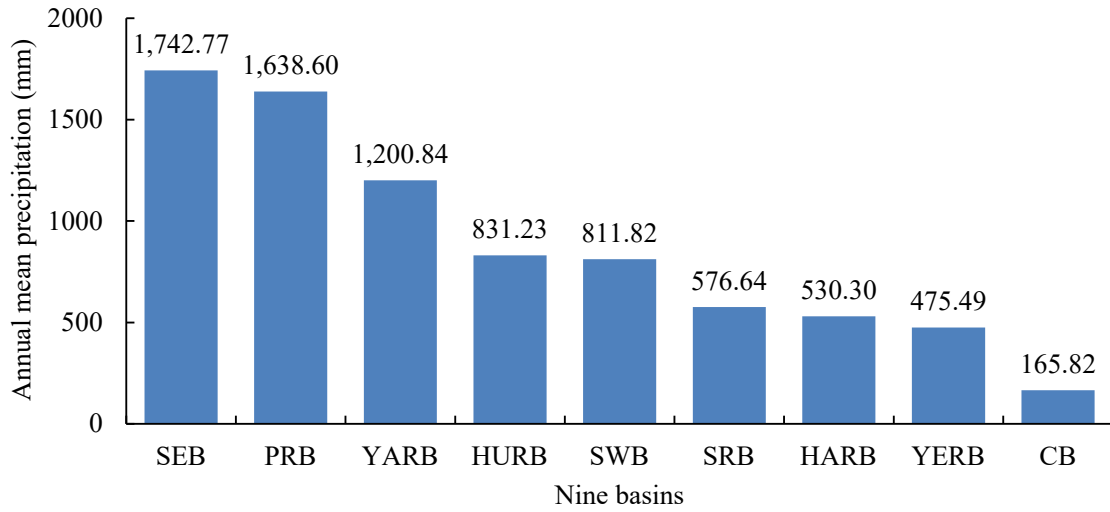

**Figure S1.** The annual mean rainfall regime based on rain gauge observations in nine basins during 2008–2017.  
 Note: CB: Continental Basin, HARB: Haihe River Basin, HURB: Huaihe River Basin, PRB: Pearl River Basin, SEB: Southeast Basin, SRB: Songliao River Basin, SWB: Southwest Basin, YARB: Yangtze River Basin; YERB: Yellow River Basin.

| CC          |         |      |       |       |       |       |       |       |       |      |       |
|-------------|---------|------|-------|-------|-------|-------|-------|-------|-------|------|-------|
| Season      | SPPs    | CB   | HARB  | HURB  | PRB   | SEB   | SRB   | SWB   | YARB  | YERB | China |
| Spring      | IMERG_E | 0.19 | 0.32  | 0.36  | 0.40  | 0.34  | 0.34  | 0.29  | 0.35  | 0.35 | 0.39  |
|             | IMERG_L | 0.17 | 0.33  | 0.36  | 0.39  | 0.36  | 0.34  | 0.29  | 0.34  | 0.35 | 0.39  |
|             | IMERG_F | 0.22 | 0.36  | 0.41  | 0.43  | 0.39  | 0.39  | 0.38  | 0.37  | 0.40 | 0.42  |
| Summer      | IMERG_E | 0.22 | 0.29  | 0.34  | 0.42  | 0.42  | 0.32  | 0.35  | 0.39  | 0.29 | 0.40  |
|             | IMERG_L | 0.22 | 0.29  | 0.34  | 0.42  | 0.46  | 0.33  | 0.35  | 0.39  | 0.28 | 0.40  |
|             | IMERG_F | 0.26 | 0.32  | 0.37  | 0.45  | 0.50  | 0.36  | 0.35  | 0.41  | 0.31 | 0.42  |
| Autumn      | IMERG_E | 0.26 | 0.32  | 0.39  | 0.47  | 0.38  | 0.33  | 0.43  | 0.42  | 0.43 | 0.42  |
|             | IMERG_L | 0.26 | 0.32  | 0.39  | 0.47  | 0.41  | 0.33  | 0.42  | 0.41  | 0.44 | 0.42  |
|             | IMERG_F | 0.33 | 0.38  | 0.44  | 0.53  | 0.45  | 0.38  | 0.45  | 0.45  | 0.49 | 0.48  |
| Winter      | IMERG_E | 0.08 | 0.18  | 0.36  | 0.48  | 0.44  | 0.09  | 0.47  | 0.41  | 0.24 | 0.44  |
|             | IMERG_L | 0.08 | 0.19  | 0.38  | 0.49  | 0.49  | 0.09  | 0.48  | 0.43  | 0.25 | 0.46  |
|             | IMERG_F | 0.14 | 0.30  | 0.44  | 0.58  | 0.51  | 0.21  | 0.55  | 0.49  | 0.31 | 0.53  |
| KGE         |         |      |       |       |       |       |       |       |       |      |       |
| Season      | SPPs    | CB   | HARB  | HURB  | PRB   | SEB   | SRB   | SWB   | YARB  | YERB | China |
| Spring      | IMERG_E | 0.17 | 0.24  | 0.15  | 0.38  | 0.34  | 0.31  | 0.27  | 0.35  | 0.35 | 0.38  |
|             | IMERG_L | 0.16 | 0.21  | 0.16  | 0.37  | 0.36  | 0.27  | 0.27  | 0.33  | 0.35 | 0.38  |
|             | IMERG_F | 0.16 | 0.32  | 0.35  | 0.43  | 0.39  | 0.36  | 0.34  | 0.36  | 0.38 | 0.41  |
| Summer      | IMERG_E | 0.01 | 0.25  | 0.32  | 0.42  | 0.40  | 0.29  | 0.34  | 0.38  | 0.28 | 0.38  |
|             | IMERG_L | 0.05 | 0.26  | 0.33  | 0.42  | 0.46  | 0.30  | 0.34  | 0.39  | 0.27 | 0.39  |
|             | IMERG_F | 0.17 | 0.29  | 0.35  | 0.44  | 0.49  | 0.33  | 0.30  | 0.39  | 0.29 | 0.40  |
| Autumn      | IMERG_E | 0.02 | 0.19  | 0.29  | 0.44  | 0.38  | 0.08  | 0.40  | 0.41  | 0.35 | 0.41  |
|             | IMERG_L | 0.01 | 0.23  | 0.31  | 0.44  | 0.41  | 0.02  | 0.41  | 0.40  | 0.39 | 0.41  |
|             | IMERG_F | 0.24 | 0.35  | 0.39  | 0.53  | 0.45  | 0.34  | 0.42  | 0.45  | 0.47 | 0.47  |
| Winter      | IMERG_E | 0.07 | 0.10  | 0.29  | 0.16  | 0.19  | 0.12  | 0.45  | 0.26  | 0.21 | 0.33  |
|             | IMERG_L | 0.06 | 0.05  | 0.31  | 0.13  | 0.13  | 0.13  | 0.45  | 0.22  | 0.19 | 0.30  |
|             | IMERG_F | 0.13 | 0.28  | 0.38  | 0.46  | 0.40  | 0.15  | 0.54  | 0.43  | 0.28 | 0.48  |
| RMSE (mm/d) |         |      |       |       |       |       |       |       |       |      |       |
| Season      | SPPs    | CB   | HARB  | HURB  | PRB   | SEB   | SRB   | SWB   | YARB  | YERB | China |
| Spring      | IMERG_E | 2.14 | 3.99  | 7.69  | 16.79 | 14.36 | 4.99  | 6.91  | 11.31 | 3.93 | 9.63  |
|             | IMERG_L | 2.31 | 4.23  | 8.10  | 16.89 | 14.38 | 5.33  | 6.85  | 11.65 | 4.13 | 9.82  |
|             | IMERG_F | 2.06 | 3.54  | 6.79  | 14.88 | 13.76 | 4.38  | 5.98  | 10.79 | 3.65 | 8.89  |
| Summer      | IMERG_E | 4.56 | 12.69 | 15.96 | 19.75 | 17.08 | 11.32 | 10.20 | 15.99 | 9.44 | 14.15 |
|             | IMERG_L | 4.83 | 13.13 | 16.65 | 20.21 | 16.79 | 11.64 | 10.40 | 16.24 | 9.91 | 14.52 |
|             | IMERG_F | 4.03 | 12.52 | 15.60 | 18.67 | 16.34 | 11.46 | 11.14 | 15.75 | 8.92 | 13.91 |
| Autumn      | IMERG_E | 2.67 | 5.79  | 8.71  | 12.27 | 12.40 | 6.18  | 6.34  | 9.35  | 5.33 | 8.46  |
|             | IMERG_L | 2.76 | 6.12  | 9.34  | 12.74 | 12.75 | 6.45  | 6.55  | 9.84  | 5.47 | 8.86  |
|             | IMERG_F | 2.14 | 4.93  | 7.76  | 12.50 | 11.82 | 4.37  | 6.91  | 8.63  | 4.58 | 7.98  |
| Winter      | IMERG_E | 1.02 | 1.29  | 3.23  | 6.98  | 9.31  | 1.84  | 3.56  | 5.85  | 1.08 | 4.45  |
|             | IMERG_L | 1.02 | 1.30  | 3.32  | 7.12  | 9.33  | 1.83  | 3.67  | 6.07  | 1.06 | 4.79  |
|             | IMERG_F | 0.93 | 0.97  | 2.97  | 5.95  | 7.76  | 1.47  | 3.06  | 4.55  | 0.89 | 3.85  |

**Figure S2.** Correlation Coefficient (CC), Kling-Gupta Efficiency (KGE) and Root Mean Square Error (RMSE) of IMERG\_E, IMERG\_L and IMERG\_F in different seasons and basins

| POD    |         |      |      |      |      |      |      |      |      |      |       |
|--------|---------|------|------|------|------|------|------|------|------|------|-------|
| Season | SPPs    | CB   | HARB | HURB | PRB  | SEB  | SRB  | SWB  | YARB | YERB | China |
| Spring | IMERG_E | 0.46 | 0.59 | 0.72 | 0.67 | 0.75 | 0.61 | 0.66 | 0.72 | 0.62 | 0.68  |
|        | IMERG_L | 0.45 | 0.58 | 0.70 | 0.66 | 0.76 | 0.61 | 0.64 | 0.71 | 0.59 | 0.66  |
|        | IMERG_F | 0.51 | 0.60 | 0.67 | 0.66 | 0.75 | 0.62 | 0.69 | 0.71 | 0.64 | 0.67  |
| Summer | IMERG_E | 0.73 | 0.76 | 0.75 | 0.86 | 0.84 | 0.79 | 0.86 | 0.81 | 0.73 | 0.80  |
|        | IMERG_L | 0.72 | 0.75 | 0.73 | 0.85 | 0.84 | 0.79 | 0.85 | 0.80 | 0.72 | 0.79  |
|        | IMERG_F | 0.71 | 0.74 | 0.74 | 0.86 | 0.85 | 0.79 | 0.87 | 0.81 | 0.74 | 0.80  |
| Autumn | IMERG_E | 0.57 | 0.65 | 0.72 | 0.62 | 0.59 | 0.60 | 0.70 | 0.63 | 0.69 | 0.64  |
|        | IMERG_L | 0.55 | 0.63 | 0.71 | 0.62 | 0.61 | 0.59 | 0.70 | 0.62 | 0.67 | 0.63  |
|        | IMERG_F | 0.55 | 0.65 | 0.73 | 0.64 | 0.63 | 0.58 | 0.71 | 0.67 | 0.67 | 0.65  |
| Winter | IMERG_E | 0.23 | 0.38 | 0.62 | 0.31 | 0.50 | 0.40 | 0.37 | 0.46 | 0.28 | 0.42  |
|        | IMERG_L | 0.23 | 0.37 | 0.61 | 0.33 | 0.52 | 0.40 | 0.36 | 0.46 | 0.26 | 0.42  |
|        | IMERG_F | 0.24 | 0.37 | 0.62 | 0.35 | 0.54 | 0.39 | 0.40 | 0.47 | 0.30 | 0.43  |
| FAR    |         |      |      |      |      |      |      |      |      |      |       |
| Season | SPPs    | CB   | HARB | HURB | PRB  | SEB  | SRB  | SWB  | YARB | YERB | China |
| Spring | IMERG_E | 0.75 | 0.70 | 0.67 | 0.34 | 0.36 | 0.62 | 0.49 | 0.43 | 0.62 | 0.51  |
|        | IMERG_L | 0.75 | 0.69 | 0.65 | 0.33 | 0.34 | 0.61 | 0.48 | 0.42 | 0.60 | 0.49  |
|        | IMERG_F | 0.76 | 0.68 | 0.64 | 0.33 | 0.34 | 0.60 | 0.50 | 0.42 | 0.61 | 0.50  |
| Summer | IMERG_E | 0.63 | 0.51 | 0.52 | 0.32 | 0.37 | 0.45 | 0.29 | 0.40 | 0.49 | 0.43  |
|        | IMERG_L | 0.63 | 0.50 | 0.50 | 0.31 | 0.34 | 0.44 | 0.28 | 0.39 | 0.48 | 0.42  |
|        | IMERG_F | 0.62 | 0.50 | 0.50 | 0.32 | 0.34 | 0.44 | 0.29 | 0.39 | 0.47 | 0.42  |
| Autumn | IMERG_E | 0.75 | 0.64 | 0.59 | 0.40 | 0.41 | 0.63 | 0.45 | 0.43 | 0.57 | 0.52  |
|        | IMERG_L | 0.74 | 0.62 | 0.57 | 0.40 | 0.38 | 0.62 | 0.44 | 0.42 | 0.55 | 0.51  |
|        | IMERG_F | 0.72 | 0.61 | 0.56 | 0.41 | 0.39 | 0.61 | 0.43 | 0.42 | 0.53 | 0.50  |
| Winter | IMERG_E | 0.76 | 0.84 | 0.72 | 0.43 | 0.42 | 0.75 | 0.69 | 0.54 | 0.78 | 0.62  |
|        | IMERG_L | 0.75 | 0.83 | 0.69 | 0.43 | 0.40 | 0.75 | 0.67 | 0.52 | 0.76 | 0.61  |
|        | IMERG_F | 0.75 | 0.78 | 0.68 | 0.43 | 0.40 | 0.74 | 0.68 | 0.52 | 0.75 | 0.59  |
| CSI    |         |      |      |      |      |      |      |      |      |      |       |
| Season | SPPs    | CB   | HARB | HURB | PRB  | SEB  | SRB  | SWB  | YARB | YERB | China |
| Spring | IMERG_E | 0.19 | 0.24 | 0.29 | 0.50 | 0.52 | 0.31 | 0.40 | 0.46 | 0.31 | 0.40  |
|        | IMERG_L | 0.19 | 0.26 | 0.30 | 0.50 | 0.54 | 0.31 | 0.41 | 0.47 | 0.31 | 0.40  |
|        | IMERG_F | 0.20 | 0.26 | 0.31 | 0.50 | 0.54 | 0.32 | 0.41 | 0.47 | 0.32 | 0.40  |
| Summer | IMERG_E | 0.32 | 0.42 | 0.41 | 0.62 | 0.56 | 0.48 | 0.64 | 0.52 | 0.43 | 0.50  |
|        | IMERG_L | 0.32 | 0.43 | 0.42 | 0.61 | 0.59 | 0.49 | 0.64 | 0.53 | 0.44 | 0.50  |
|        | IMERG_F | 0.33 | 0.43 | 0.42 | 0.61 | 0.59 | 0.49 | 0.64 | 0.53 | 0.44 | 0.51  |
| Autumn | IMERG_E | 0.21 | 0.30 | 0.35 | 0.44 | 0.42 | 0.29 | 0.45 | 0.43 | 0.36 | 0.38  |
|        | IMERG_L | 0.22 | 0.31 | 0.37 | 0.44 | 0.44 | 0.30 | 0.45 | 0.43 | 0.37 | 0.38  |
|        | IMERG_F | 0.23 | 0.32 | 0.38 | 0.44 | 0.45 | 0.30 | 0.46 | 0.45 | 0.38 | 0.39  |
| Winter | IMERG_E | 0.13 | 0.13 | 0.24 | 0.26 | 0.37 | 0.18 | 0.20 | 0.30 | 0.14 | 0.24  |
|        | IMERG_L | 0.13 | 0.13 | 0.26 | 0.26 | 0.38 | 0.18 | 0.21 | 0.31 | 0.14 | 0.25  |
|        | IMERG_F | 0.14 | 0.16 | 0.27 | 0.28 | 0.40 | 0.19 | 0.22 | 0.31 | 0.16 | 0.26  |

**Figure S3.** Probability of detection (POD), False Alarm Ratio (FAR) and Critical Success Index (CSI) of IMERG\_E, IMERG\_L and IMERG\_F in different seasons and basins

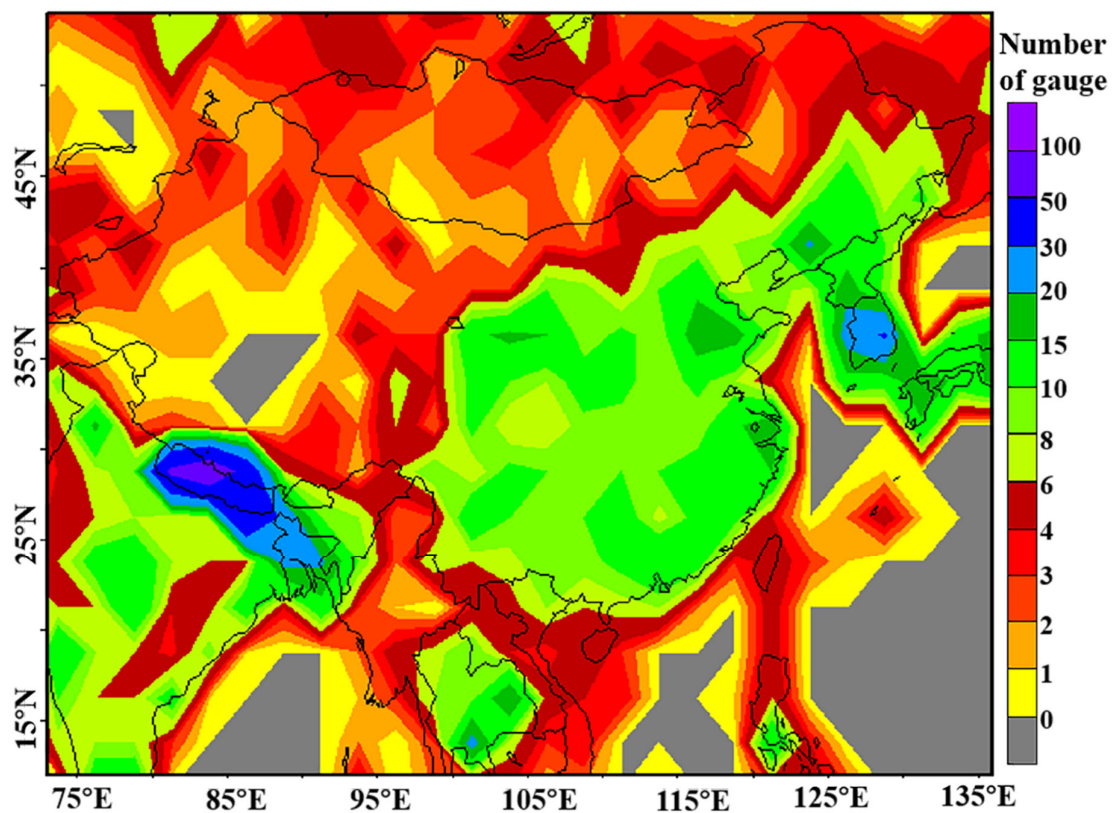

**Figure S4.** Spatial distribution number of rain gauges of Global Precipitation Climatology Centre (GPCC) Precipitation Climatology in 0.5° (a) and 2.5° (b) spatial resolution across China.

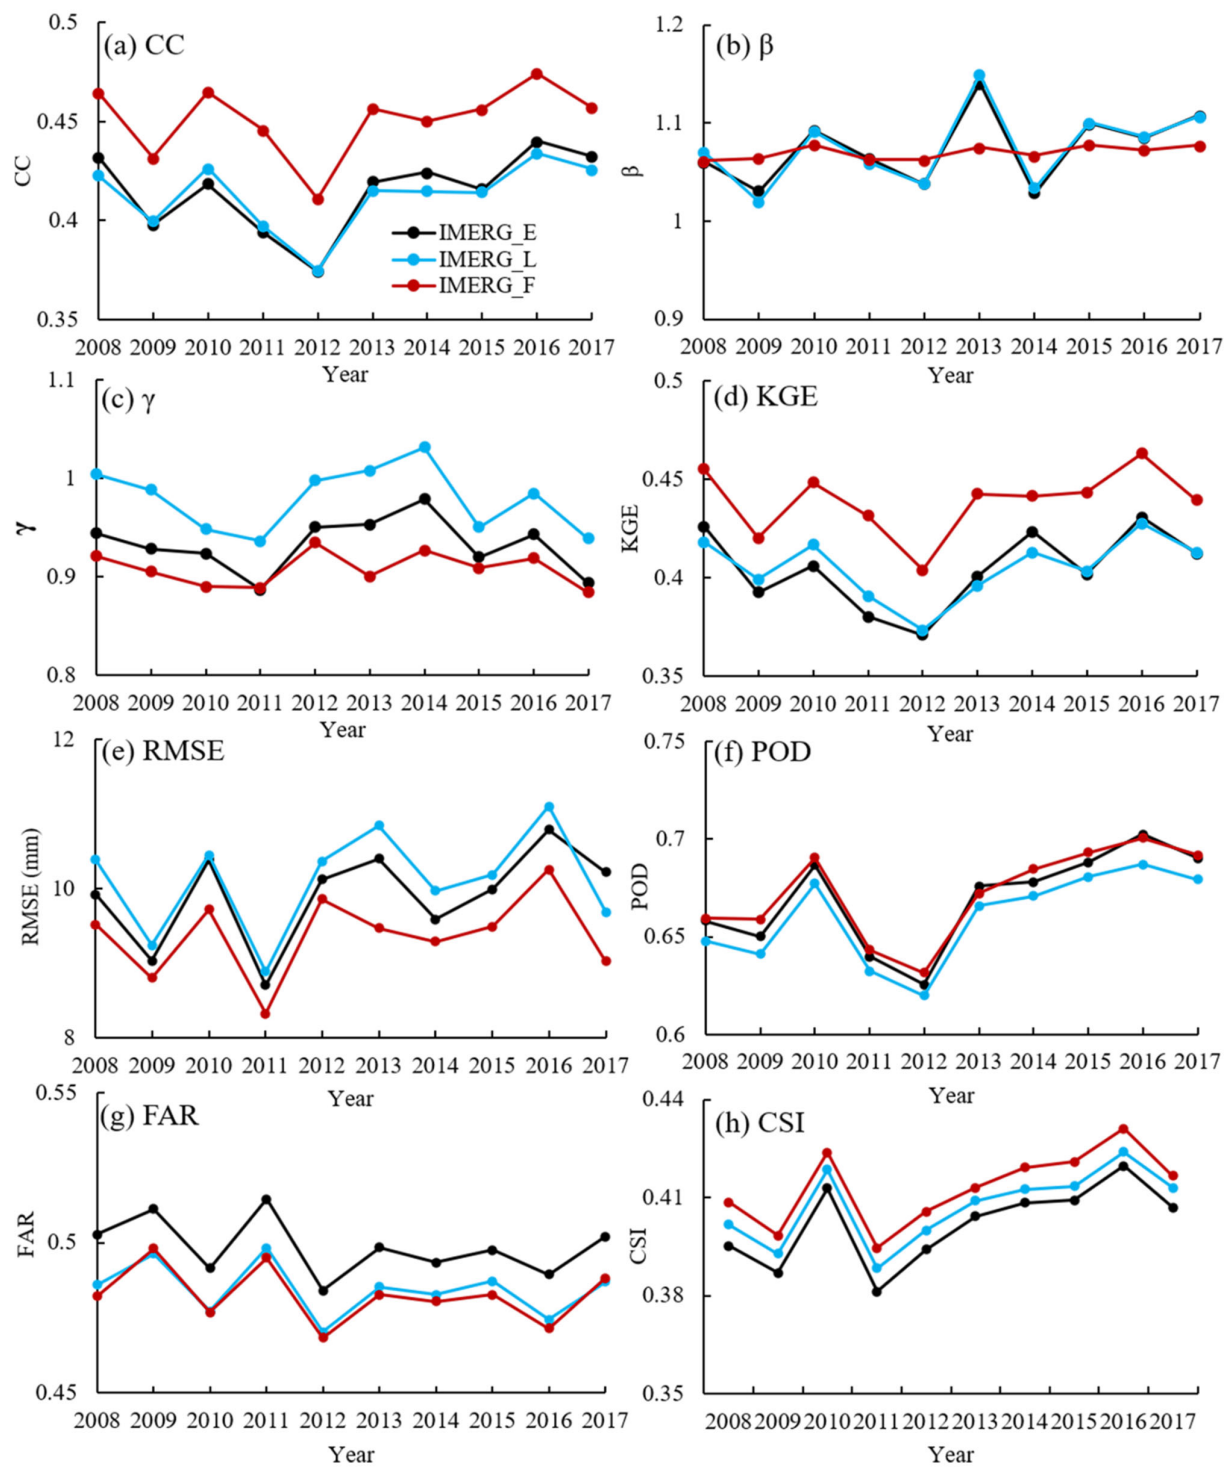

**Figure S5.** Annual evaluation metrics for IMERG\_E, IMERG\_F and IMERG\_F products from 2008 to 2017
